# Supplementary material for: Sub-ppt determination of butyltins, methylmercury and inorganic mercury in natural waters by dynamic headspace in-tube extraction and GC-ICPMS detection
Source: Royal Society of Chemistry journal article supplement (doi:10.1039/c7ja00296c), 2017-01-01
Supplement: c7ja00296c1.pdf [file c7ja00296c1.pdf]

Supporting Information for:

**Sub ppt determination of butyltins, methylmercury and inorganic mercury  
in natural waters by dynamic headspace in-tube extraction and GC-  
ICPMS detection**

Jing Hu<sup>a, b</sup>, Enea Pagliano<sup>b</sup>, Xiandeng Hou<sup>a</sup>, Chengbin Zheng<sup>a</sup>, Lu Yang<sup>b\*</sup> and Zoltan  
Mester<sup>b</sup>

<sup>a</sup> Analytical & Testing Center, Sichuan University, 29 Wangjiang Rd, Chengdu, Sichuan  
610064, China.

<sup>b</sup> National Research Council Canada, 1200 Montreal Rd, Ottawa, Ontario, K1A 0R6, Canada.

Supporting Information (SI) Contents:

Page S-2: Table S1. GC-ICPMS and EIMS operating parameters

Page S-3: Table S2. Properties of ITEX sorbent materials used

Page S-4: GC-MS spectra for propylated and ethylated TBT, Figure S1

Page S-5: GC-MS spectra for propylated and ethylated DBT, Figure S2

Page S-6: GC-MS spectra for propylated and ethylated MBT, Figure S3

**Table S1. GC-ICPMS and EIMS operating parameters**

|               |                           |                                                               |
|---------------|---------------------------|---------------------------------------------------------------|
| <b>GC</b>     | Column                    | Zebron ZB-5MS (30 m × 0.25 mm × 0.25 µm)                      |
|               | Injection mode            | Splitless                                                     |
|               | Inlet temperature         | 260 °C                                                        |
|               | Carrier gas               | Helium, 1 mL min <sup>-1</sup>                                |
|               | Oven program              | 60 °C (hold for 1 min), 25 °C /min to 260 °C (hold for 6 min) |
|               | Transfer line temperature | 260 °C                                                        |
| <b>ICP-MS</b> | RF power                  | 820 W                                                         |
|               | RF matching               | 1.77 V                                                        |
|               | Sample depth              | 7.5 mm                                                        |
|               | Torch-H                   | 0.3 mm                                                        |
|               | Torch-V                   | -1.4 mm                                                       |
| <b>EIMS</b>   | Carrier gas               | 1.23 L/min                                                    |
|               | Source temperature        | 230 °C                                                        |
|               | EM volts                  | 1628 V                                                        |
|               | Electron energy           | 70 eV                                                         |
|               | Ion polarity              | Positive                                                      |
|               | Detector temperature      | 250 °C                                                        |

**Table S2. Properties of sorbent materials used (manufacturer's data)**

| Sorbent                      | Sorbent type                               | Surface area<br>(m <sup>2</sup> g <sup>-1</sup> ) | Temperature<br>limit (°C) | Water affinity | application                          |
|------------------------------|--------------------------------------------|---------------------------------------------------|---------------------------|----------------|--------------------------------------|
| Carbopack C                  | non-porous graphitized carbon black        | 10                                                | 500                       | relatively low | low to medium boilers (C12~C20)      |
| Carboxen 1000                | carbon molecular sieve                     | 1200                                              | 225                       | moderate       | very volatile compounds (C2-C5)      |
| Molecular sieve 5A           | crystalline metal aluminosilicates         | NA                                                | NA                        | NA             | NA                                   |
| Carbosieve S III             | carbon molecular sieve                     | 975                                               | 400                       | moderate       | volatile organics (C2-C5)            |
| Tenax TA/Carbosieve S III    | porous organic polymer/carbon molecular    | NA                                                | NA                        | NA             | NA                                   |
| Carbopack C/Carbosieve S III | sieve non-porous graphitized carbon        | NA                                                | NA                        | NA             | NA                                   |
|                              | black/carbon molecular sieve               |                                                   |                           |                |                                      |
| Molecular sieve 5A           | crystalline metal aluminosilicates         | NA                                                | NA                        | NA             | NA                                   |
| Tenax GR/Carbosieve S III    | 70% porous organic polymer-30% graphitized | 24                                                | 350                       | low            | volatiles, flavors                   |
|                              | carbon/carbon molecular sieve              |                                                   |                           |                |                                      |
| Tenax TA                     | porous organic polymer                     | 35                                                | 350                       | low            | volatiles and semivolatiles (C7-C26) |

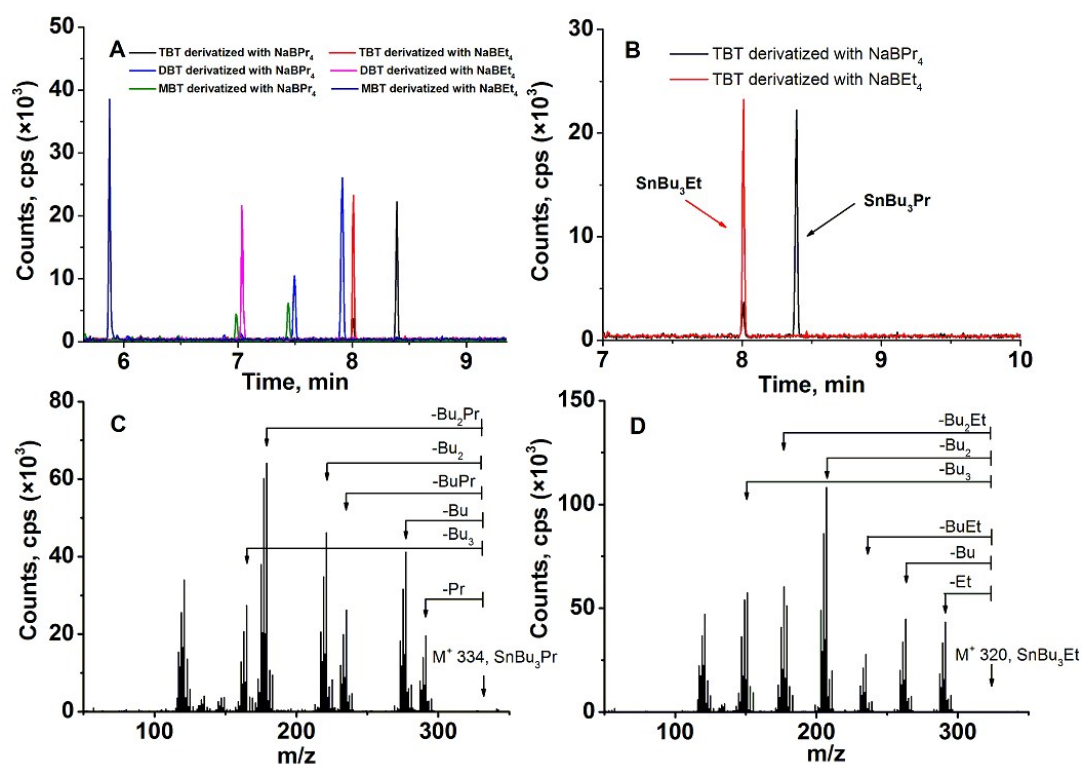

Figure S1. GC-MS chromatograms of (A) propylated and ethylated TBT, DBT and MBT, and (B) propylated and ethylated TBT in full scan mode; Extracted peak spectra of (C) propylated TBT and (D) ethylated TBT.

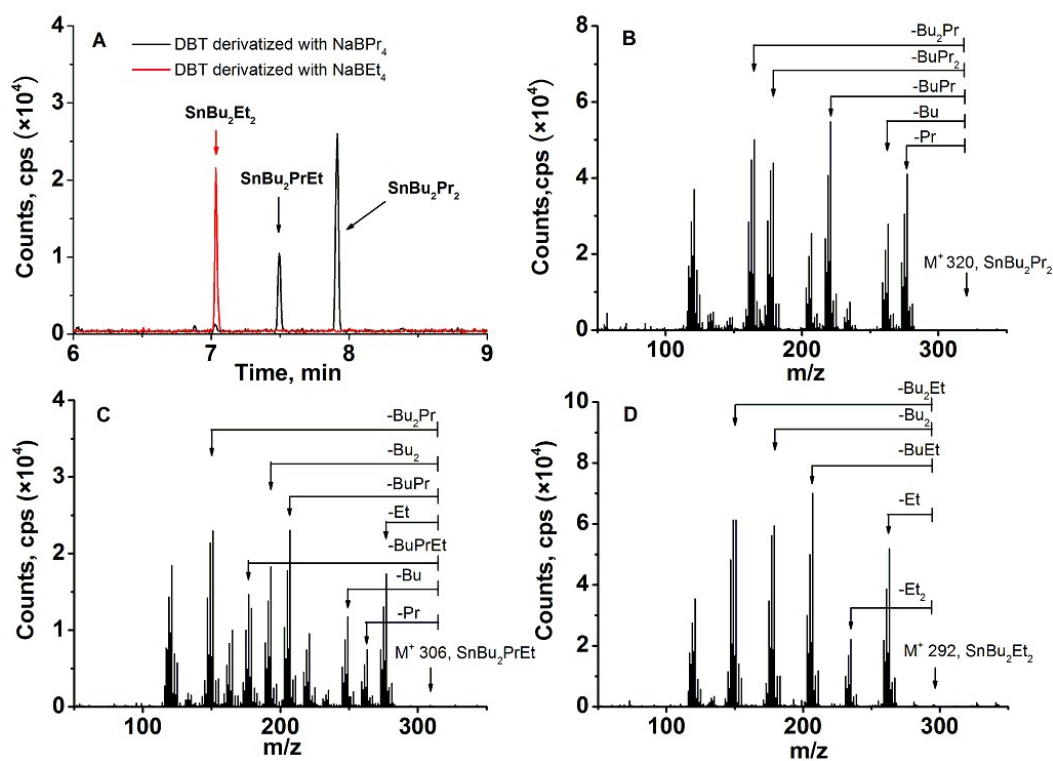

Figure S2. GC-MS chromatogram of propylated and ethylated DBT in full scan mode (A) and extracted peak spectra of propylated DBT (B, C, D).

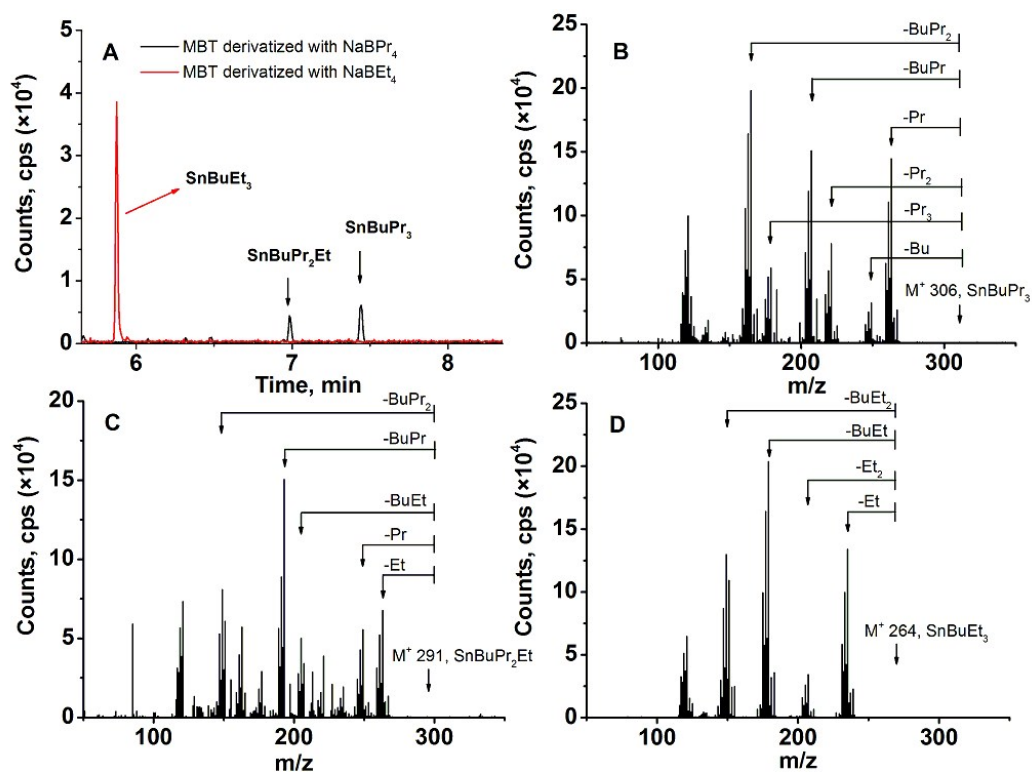

Figure S3. GC-MS chromatogram of propylated and ethylated MBT in full scan mode (A) and extracted peak spectra of propylated MBT (B, C, D). The difference in intensities was due to the different concentration of MBT used in ethylation ( $2 \mu\text{g ml}^{-1}$ ) and proylation ( $0.5 \mu\text{g ml}^{-1}$ ).
